# Supplementary material for: In situ preparation of ultrastable and flexible BA2PbBr4 nanocrystal films for X-ray imaging
Source: Royal Society of Chemistry journal article supplement (doi:10.1039/d3tc02083e), 2023-01-01
Supplement: d3tc02083e1.pdf [file d3tc02083e1.pdf]

## **In Situ Preparation of Ultrastable and Flexible BA<sub>2</sub>PbBr<sub>4</sub> Nanocrystal Films for X-ray Imaging**

Yang Li\*, Bo Liu, Liang Chen, Shiyi He, Jinliang Liu, Xiang Wang, Naizhe Zhao, Leidang Zhou, Wenyu Shu, Xiaoping Ouyang\*

### **Experimental Section :**

Chemicals: Butylammonium Bromide (BABr, 98%) was provided by the: Advanced Election Technology Co., Ltd. Lead bromide (PbBr<sub>2</sub>, 99%), dimethylformamide (DMF, 99.9%) and Polymethyl methacrylate (PMMA) were purchased from Aladdin.

### **Characterization:**

Powder X-ray diffraction was performed using an X-ray diffractometer (Bruker, D8 ADVANCE) with Cu K $\alpha$  radiation (1.54 Å). The optical transmission spectrum was recorded by an UV-vis spectrophotometer (Shimadzu, UV3600 plus). PL spectrum and PLQY were performed on an Edinburgh FLS1000 fluorescence spectrometer excited by the 365 nm xenon lamps. PL decay curve was measured through an Edinburgh FLS1000 fluorescence spectrometer with a 365 nm picosecond pulsed diode laser.

### **X-ray scintillation measurements**

RL spectrum measurements were carried out with an X-ray tube (12 W X-ray source manufactured by Moxtek Inc.) at 30 kV and a spectrometer (Newport 74126). The dose rate was altered by changing the current and calibrated by a dosimeter (RJ32-3602). Decay time was measured by a home-made time-correlated single-photon counting (TCSPC) system which consists of a PMT (ET Enterprises Limited-9815), a microchannel plate (MCP, R3809U-52), a time-to-amplitude converter (TAC, ORTEC 567), a constant-fraction discriminator (ORTEC 935), a timing discriminator (ORTEC 9327), a delay unit (ORTEC, 425) and a computer-controlled multichannel analyzer (Amptek, MCA8000A). The isotope source <sup>137</sup>Cs was chosen to be the excitation source. During the decay time measurement, one side of the BA<sub>2</sub>PbBr<sub>4</sub> NC@PMMA film is directly coupled to the PMT, which can collect the photons emitted from the scintillator and generate an initial pulse signal.

This initial pulse signal is processed through the subsequent electronics system (a timing discriminator and a delay unit) and triggered by a time-to-amplitude converter as the start signal. Simultaneously, the other side of the  $\text{BA}_2\text{PbBr}_4 \text{ NC@PMMA}$  film emits the single photons which can be collected by a microchannel plate. The single photon signal produced by the microchannel plate is processed through a constant-fraction discriminator and triggered by the time-to-amplitude converter as a stop signal. The distribution of the time interval between the start signals and stop signal which represent the autocorrelation function of the fluorescence temporal profile can be converted into voltage amplitude by the time-to-amplitude converter. Finally, the voltage amplitude is converted into a digital signal by the multichannel analyzer. The X-ray imaging measurements were performed using a self-build X-ray imaging system which contains an X-ray tube (Anode material: Ag, the radius of an aluminum collimator: 5mm), a mirror and a COMS camera (Tucsen FL-20BW). The X-ray tube, target object and scintillation film are successively placed in the same straight direction. A mirror is used to deflect the light path by  $90^\circ$  to protect the COMS camera from being exposed to X-rays. The X-ray images are captured by the COMS camera. MTF measurement: A sharp-edge X-ray imaging were taken from a 0.5 mm thick tungsten plate, and the X-ray dose rate calibrated by a dosimeter (RJ32-3602) was  $825.3 \mu\text{Gyair/s}$ . The edge spread function (ESF) was extracted through processing the X-ray image of the sharp edge, and the corresponding line spread function (LSF) can be obtained by its first derivation. MTF is defined by the Fourier transform of the LSF as follow:

$$MTF(v) = F(LSF(x)) = F\left(\frac{dESF(x)}{dx}\right)$$

Where  $v$  was the spatial frequency,  $x$  was the position of pixel. The above calculations were processed using MATLAB software.

本底,尤其是在加速氘离子时,氘离子被限流孔和管  
束中子。  
“束流头部切分”的方法。这是把切分器紧靠在离子源  
比较,这种方法的本底要小一个数量级。是,要在离  
源会带有很多麻烦,对加速离子束,是方便的,  
法,由于离子源,粒子能量大,所以 11.27)式  
毫微秒束流脉冲,例如,当  $V = 1\text{keV}$ ,  $L = 1\text{cm}$ ,  $\Delta$   
1kV,  $L_1 = 4\text{cm}$ ,  $L_2 = 3\text{cm}$ , 代入(11.27)式即可得  $\Delta t$   
短的脉冲。要采取束束的方法,它的原理是利用一对  
、行进在的粒子减速向后靠,把速度较慢滞迟在后  
窄的脉冲,同时束流也可以大大增强。  
器上建立起来的快中子飞行时间谱仪,进行快中子能  
能谱测量已经有一、二十年的历史了。近年来,方法上  
进。应用束调管聚束原理以及所谓 Mobley 聚束磁铁  
。例如,在北京中国原子能科学研究院 HI-13 串列式

Figure S1 The photograph of the  $\text{BA}_2\text{PbBr}_4$  NC@PMMA flexible film

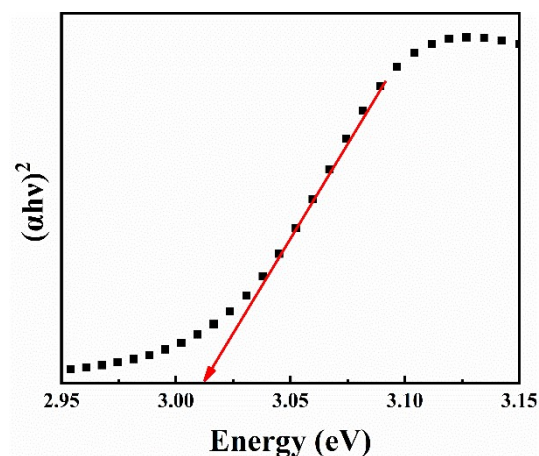

Figure S2 Band gap of  $\text{BA}_2\text{PbBr}_4$  NC@PMMA flexible film extracted from the Tauc plot.

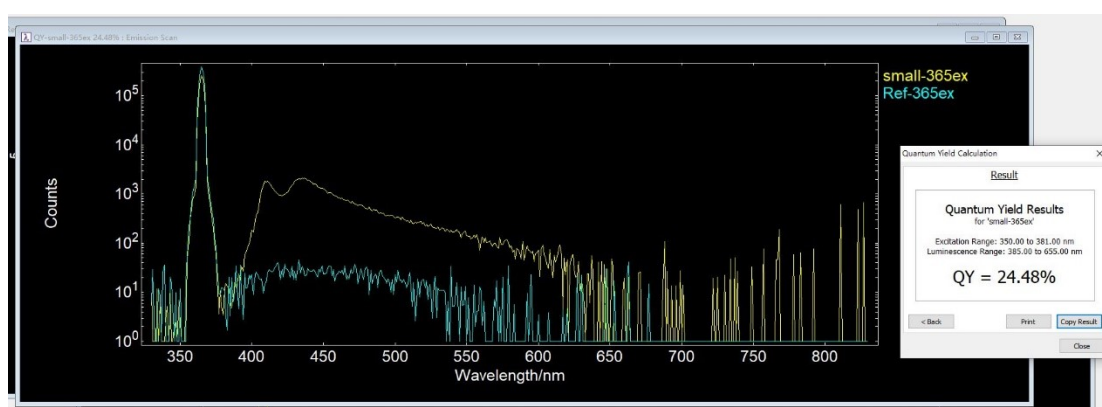

Figure S3 The PLQY curve of  $\text{BA}_2\text{PbBr}_4$  NC@PMMA film.

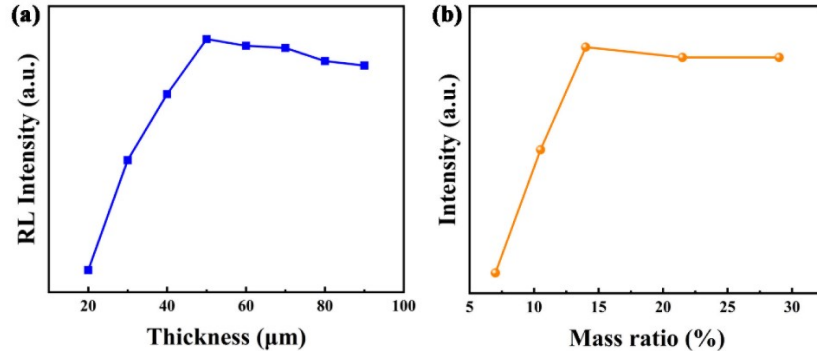

Figure S4 RL intensity of sample with different thickness and mass ratio.

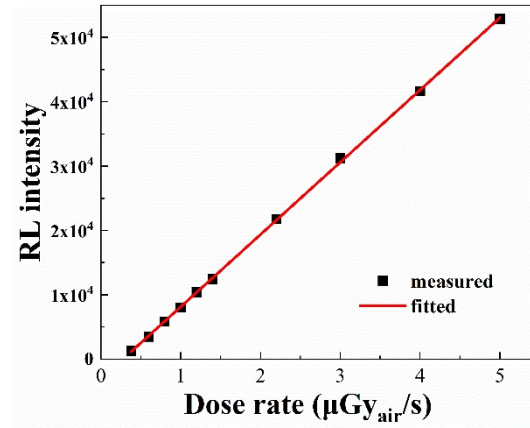

Figure S5 Dose rate-dependent RL spectra of BA<sub>2</sub>PbBr<sub>4</sub> NC@PMMA flexible film

Table S1 Comparison of the performances in other flexible scintillators

| Material                                                                        | Detection limit<br>[nGy <sub>air</sub> /s] | Spatial resolution<br>[lp/mm] | PL decay<br>time<br>[ns] | Storage stability<br>[h] | Ref       |
|---------------------------------------------------------------------------------|--------------------------------------------|-------------------------------|--------------------------|--------------------------|-----------|
| CsPbBr <sub>3</sub> /PMMA (40μm)                                                | 40.1                                       | 8.0                           | 8.25                     | 2520(>80% in water)      | 1         |
| CH <sub>3</sub> NH <sub>3</sub> PbBr <sub>3</sub> NCs (10μm)                    | 1.6                                        | 5.4                           | 63.7                     | 168(>80% in water)       | 2         |
| Cs <sub>3</sub> Cu <sub>2</sub> I <sub>5</sub> powders/PDMS (100μm)             | /                                          | 6.8                           | 960                      | 1440 (unchanged in air)  | 3         |
| CsPbBr <sub>3</sub> NCs/AAO (20μm)                                              | /                                          | 250                           | 9                        | 4008 (unchanged in air)  | 4         |
| (C <sub>24</sub> H <sub>20</sub> P) <sub>2</sub> MnBr <sub>4</sub> -TPU (115μm) | 608                                        | 14.5                          | 3.16*10 <sup>5</sup>     | 4320(unchanged in air)   | 5         |
| BA <sub>2</sub> PbBr <sub>4</sub> NC@PMMA                                       | 588                                        | 5.5                           | 2.07                     | 120(>90% in water)       | This work |

1. B. Wang, J. Peng, X. Yang, W. Cai, H. Xiao, S. Zhao, Q. Lin and Z. Zang, Laser Photonics Rev., 2022, 16, 2100736, DOI: 10.1002/lpor.202100736.

2. Q. Xu, S. Zhou, J. Huang, X. Ouyang, J. Liu, Y. Guo, J. Wang, J. Nie, X. L. Zhang, X. P. Ouyang, W. B. Jia, *Mater. Today Phys.* 2021, 18, 100390, DOI: 10.1016/j.mtphys.2021.100390.
3. N. Li, Z. Xu, Y. Xiao, Y. Liu, Z. Yang and S. Liu, *Adv. Opt. Mater.*, 2022, 10, 2102232, DOI: 10.1002/adom.202102232.
4. H. H. Li, H. Yang, R. Yuan, Z. X. Sun, Y. L. Yang, J. T. Zhao, Q. L. Li, Z. J. Zhang, *Adv. Opt. Mater.*, 2021, 9, 2101297, DOI: 10.1002/adom.202101297.
5. In Situ Preparation of High-Quality Flexible Manganese Halide Scintillator Films for X-Ray Imaging. K. Xia, P. Ran, W. Wang, J. Yu, G. Xu, K. Wang, X. Pi, Q. He, Y. Yang and J. Pan, *Adv. Opt. Mater.*, 2022, 10, 2201028, DOI: 10.1002/adom.202201028.
